# Supplementary material for: Implementation of a complex intervention to improve participation in older people with joint contractures living in nursing homes: a process evaluation of a cluster-randomised pilot trial
Source: PubMed Central journal article supplement (PMC7405353; doi:10.1186/s12877-020-01655-z), 2020-08-05
Supplement: 12877_2020_1655_MOESM1_ESM.pdf [file 12877_2020_1655_MOESM1_ESM.pdf]

**Implementation of a complex intervention to improve participation  
in older people with joint contractures living in nursing homes:  
A process evaluation of a cluster-randomised pilot trial**

**Table of Contents**

|                                                                                           |   |
|-------------------------------------------------------------------------------------------|---|
| <b>Figure A1</b> Logic model of the Participation Enabling CAre in Nursing Intervention   | 2 |
| <b>Table A1</b> Self-assessed preparedness for the role as facilitator after the workshop | 3 |
| <b>Table A2</b> Nursing care of residents with joint contractures                         | 4 |

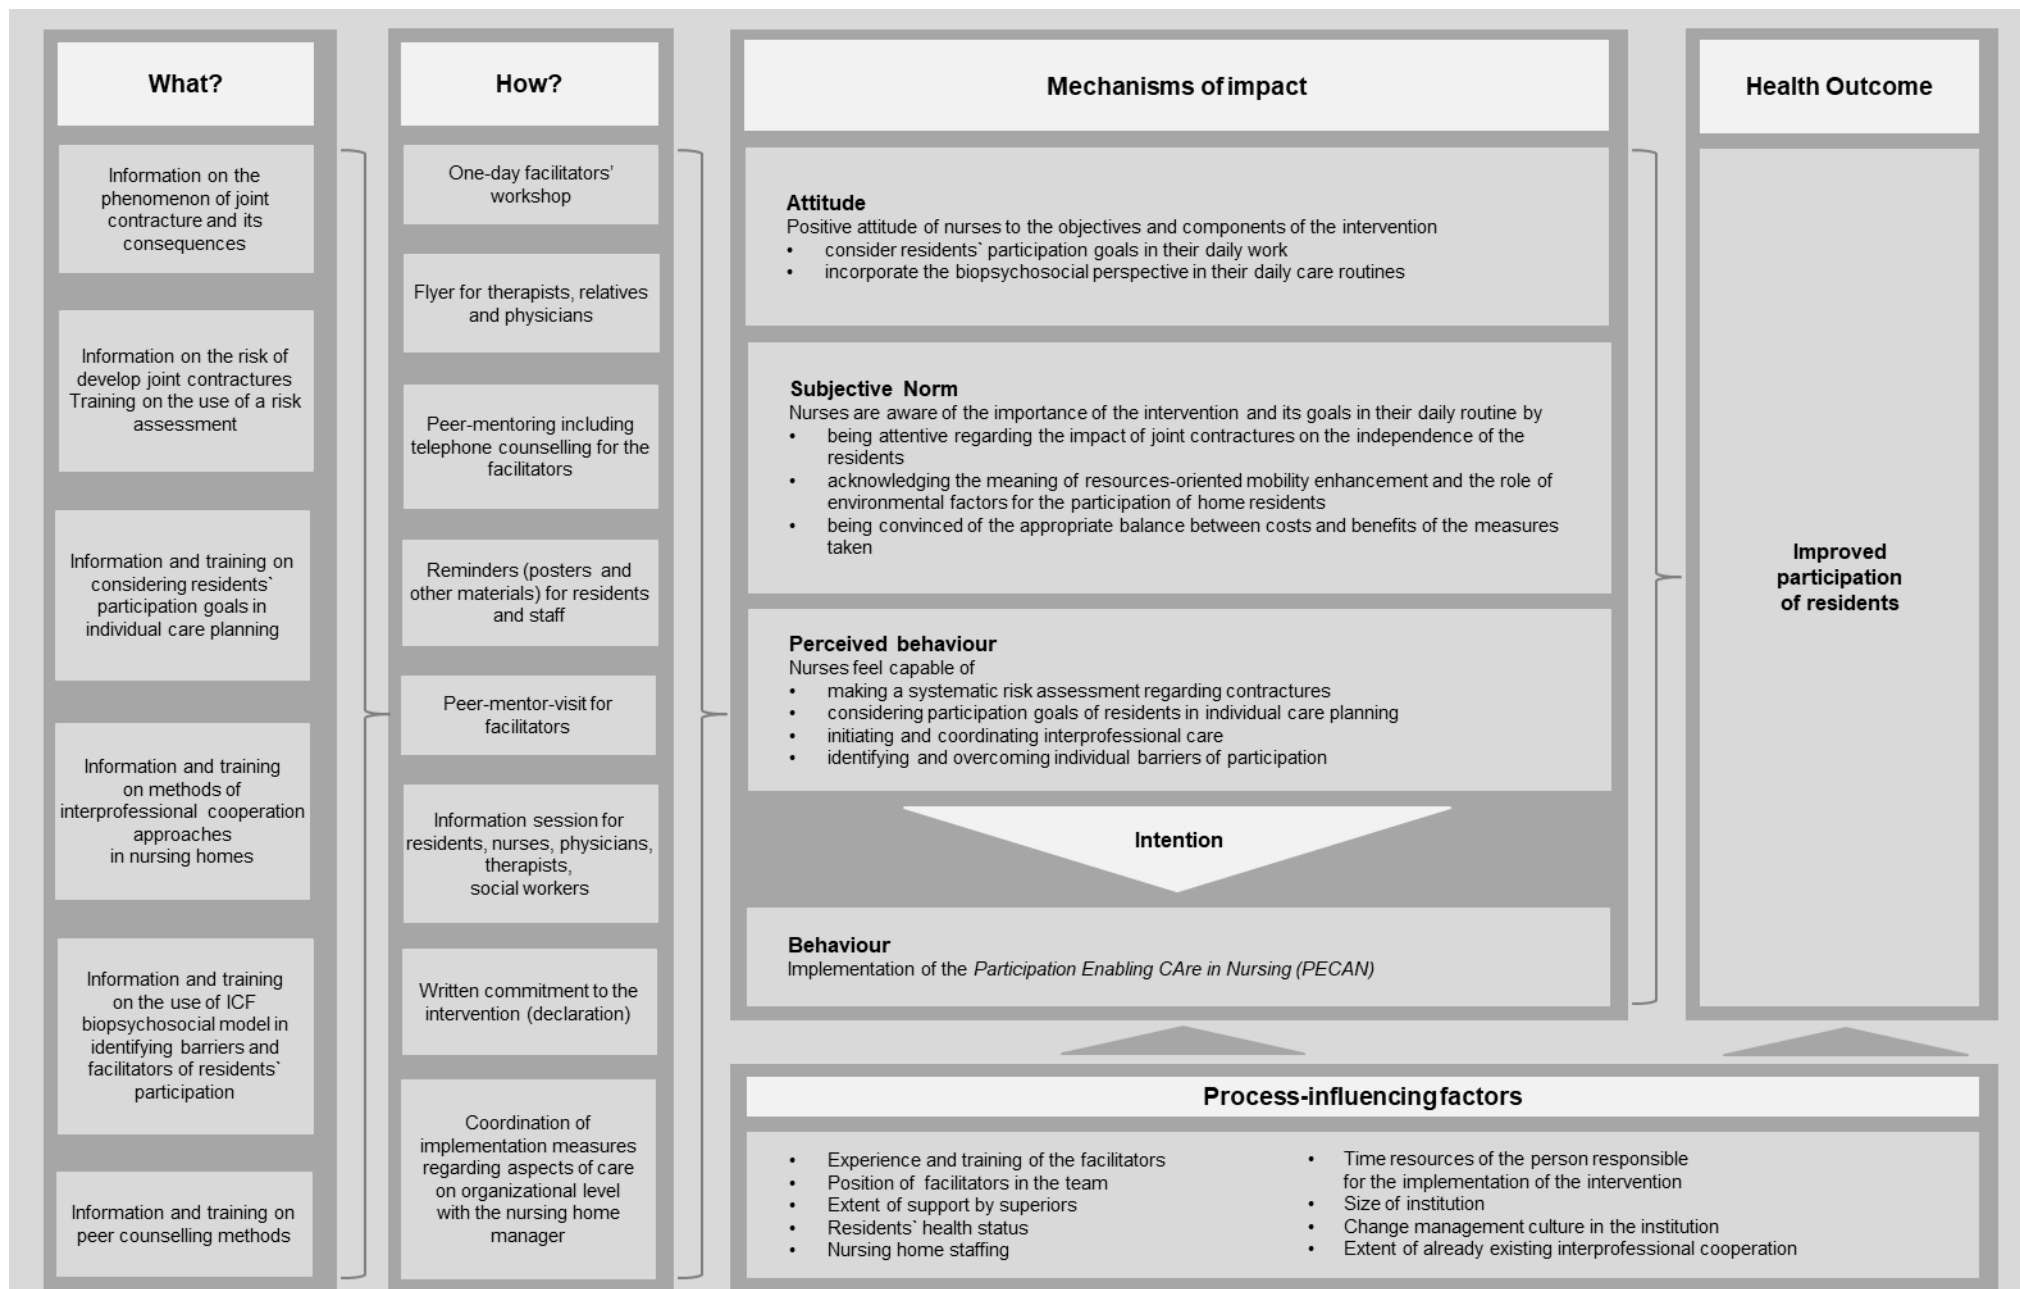

**Figure A1** Logic model of the Participation Enabling CARE in Nursing Intervention adapted from Saal et al. (2018)

**Table A2** Self-assessed preparedness for the role as facilitator after the workshop

|                                                                                                   | n=14 |
|---------------------------------------------------------------------------------------------------|------|
| Competence to use a biographical approach while planning measures. <sup>1</sup>                   |      |
| Excellent / good                                                                                  | 11   |
| Less / not at all                                                                                 | 3    |
| Competence to encourage residents for activities. <sup>1</sup>                                    |      |
| Excellent / good                                                                                  | 12   |
| Less / not at all                                                                                 | 2    |
| Competence to enable the residents to participate without restrictions. <sup>1</sup>              |      |
| Excellent / good                                                                                  | 12   |
| Less / not at all                                                                                 | 2    |
| Competence to identify barriers and initiate changes in the nursing home. <sup>1</sup>            |      |
| Excellent / good                                                                                  | 9    |
| Less / not at all                                                                                 | 4    |
| Competence to be active in the adaptation of care plans. <sup>1</sup>                             |      |
| Excellent / good                                                                                  | 13   |
| Less / not at all                                                                                 | 1    |
| Competence to review needs for technical and medical aids together with a therapist. <sup>1</sup> |      |
| Excellent / good                                                                                  | 11   |
| Less / not at all                                                                                 | 3    |
| Confidence in the own performance of the role as facilitator <sup>2</sup>                         |      |
| Excellent / good                                                                                  | 7    |
| Average                                                                                           | 7    |
| Less / not at all                                                                                 | 0    |

<sup>1</sup>Based on a 4-Point-Likert-Scale (1=excellent, 2=good, 3=less, 4=not at all)

<sup>2</sup>Based on a 5-Point-Likert-Scale (1=excellent, 2=good, 3=average, 4=less, 5=not at all)

**Table A2** Nursing care of residents with joint contractures

| Do you agree with the following statements?                                                                                                                 | Baseline               |                   |                 | 6-month follow-up      |                   |                 |
|-------------------------------------------------------------------------------------------------------------------------------------------------------------|------------------------|-------------------|-----------------|------------------------|-------------------|-----------------|
|                                                                                                                                                             | Intervention<br>(n=51) | Control<br>(n=21) | Total<br>(n=72) | Intervention<br>(n=45) | Control<br>(n=36) | Total<br>(n=81) |
|                                                                                                                                                             | n (%)                  | n (%)             | n (%)           | n (%)                  | n (%)             | n (%)           |
| <b>We often discuss how to improve the care of residents with joint contractures to enable them to participate in social life in the best possible way.</b> |                        |                   |                 |                        |                   |                 |
| Agree                                                                                                                                                       | 22 (43)                | 8 (38)            | 30 (41)         | 30 (67)                | 17 (47)           | 47 (58)         |
| Neutral                                                                                                                                                     | 13 (25)                | 6 (29)            | 19 (26)         | 10 (22)                | 12 (33)           | 22 (27)         |
| Disagree                                                                                                                                                    | 13 (26)                | 6 (29)            | 19 (26)         | 4 (9)                  | 7 (19)            | 11 (14)         |
| Don't know                                                                                                                                                  | 3 (6)                  | 1 (5)             | 4 (6)           | 1 (2)                  | 0                 | 1 (1)           |
| <b>There are regular team meetings to discuss the care of residents with or at risk of joint contractures.</b>                                              |                        |                   |                 |                        |                   |                 |
| Agree                                                                                                                                                       | 18 (36)                | 8 (38)            | 26 (36)         | 32 (71)                | 15 (41)           | 47 (59)         |
| Neutral                                                                                                                                                     | 11 (22)                | 3 (14)            | 14 (19)         | 3 (7)                  | 12 (33)           | 15 (19)         |
| Disagree                                                                                                                                                    | 19 (37)                | 10 (48)           | 29 (41)         | 8 (18)                 | 9 (25)            | 17 (21)         |
| Don't know                                                                                                                                                  | 3 (6)                  | 0                 | 3 (4)           | 2 (4)                  | 0                 | 2 (2)           |
| <b>Individual biography and interests of residents with joint contractures are considered when planning activities and participation.</b>                   |                        |                   |                 |                        |                   |                 |
| Agree                                                                                                                                                       | 33 (65)                | 14 (67)           | 47 (65)         | 35 (77)                | 28 (78)           | 63 (78)         |
| Neutral                                                                                                                                                     | 6 (12)                 | 4 (19)            | 10 (14)         | 7 (16)                 | 4 (11)            | 11 (14)         |
| Disagree                                                                                                                                                    | 10 (20)                | 3 (15)            | 13 (18)         | 2 (4)                  | 3 (8)             | 5 (6)           |
| Don't know                                                                                                                                                  | 2 (4)                  | 0                 | 2 (3)           | 1 (2)                  | 1 (3)             | 2 (2)           |
| <b>Independent action and mobility of residents with joint contractures is more important than the completion of a certain workload.</b>                    |                        |                   |                 |                        |                   |                 |
| Agree                                                                                                                                                       | 22 (43)                | 9 (43)            | 31 (43)         | 30 (67)                | 24 (67)           | 54 (67)         |
| Neutral                                                                                                                                                     | 8 (16)                 | 6 (29)            | 14 (19)         | 8 (18)                 | 6 (17)            | 14 (17)         |
| Disagree                                                                                                                                                    | 13 (26)                | 4 (19)            | 17 (23)         | 6 (13)                 | 4 (11)            | 10 (12)         |
| Don't know                                                                                                                                                  | 7 (14)                 | 2 (10)            | 9 (13)          | 1 (2)                  | 1 (3)             | 2 (2)           |
| Missing                                                                                                                                                     | 1 (2)                  | 0                 | 1 (1)           | 0                      | 1 (3)             | 1 (1)           |
| <b>Residents with joint contractures are enabled to participate in individual daily activities like cooking, gardening or walking.</b>                      |                        |                   |                 |                        |                   |                 |
| Agree                                                                                                                                                       | 27 (53)                | 12 (57)           | 39 (54)         | 32 (71)                | 13 (36)           | 45 (56)         |
| Neutral                                                                                                                                                     | 10 (20)                | 3 (14)            | 13 (18)         | 6 (13)                 | 10 (28)           | 16 (20)         |
| Disagree                                                                                                                                                    | 9 (18)                 | 6 (28)            | 15 (21)         | 7 (15)                 | 10 (27)           | 17 (21)         |
| Don't know                                                                                                                                                  | 4 (8)                  | 0                 | 4 (6)           | 0                      | 3 (8)             | 3 (4)           |
| Missing                                                                                                                                                     | 1 (2)                  | 0                 | 1 (1)           | 0                      | 0                 | 0               |
| <b>The collaboration with the residents' therapists works out well.</b>                                                                                     |                        |                   |                 |                        |                   |                 |
| Agree                                                                                                                                                       | 44 (86)                | 16 (76)           | 60 (84)         | 33 (73)                | 21 (58)           | 54 (67)         |
| Neutral                                                                                                                                                     | 5 (10)                 | 2 (10)            | 7 (10)          | 8 (18)                 | 8 (22)            | 16 (20)         |
| Disagree                                                                                                                                                    | 2 (4)                  | 3 (15)            | 5 (7)           | 2 (4)                  | 4 (12)            | 6 (8)           |
| Don't know                                                                                                                                                  | 0                      | 0                 | 0               | 2 (4)                  | 3 (8)             | 5 (6)           |
